# Supplementary material for: The Cytochrome bd Oxidase of Porphyromonas gingivalis Contributes to Oxidative Stress Resistance and Dioxygen Tolerance
Source: PubMed Central journal article supplement (PMC4668044; doi:10.1371/journal.pone.0143808), 2015-12-02
Supplement: pone.0143808.s002.pdf [file pone.0143808.s002.pdf]

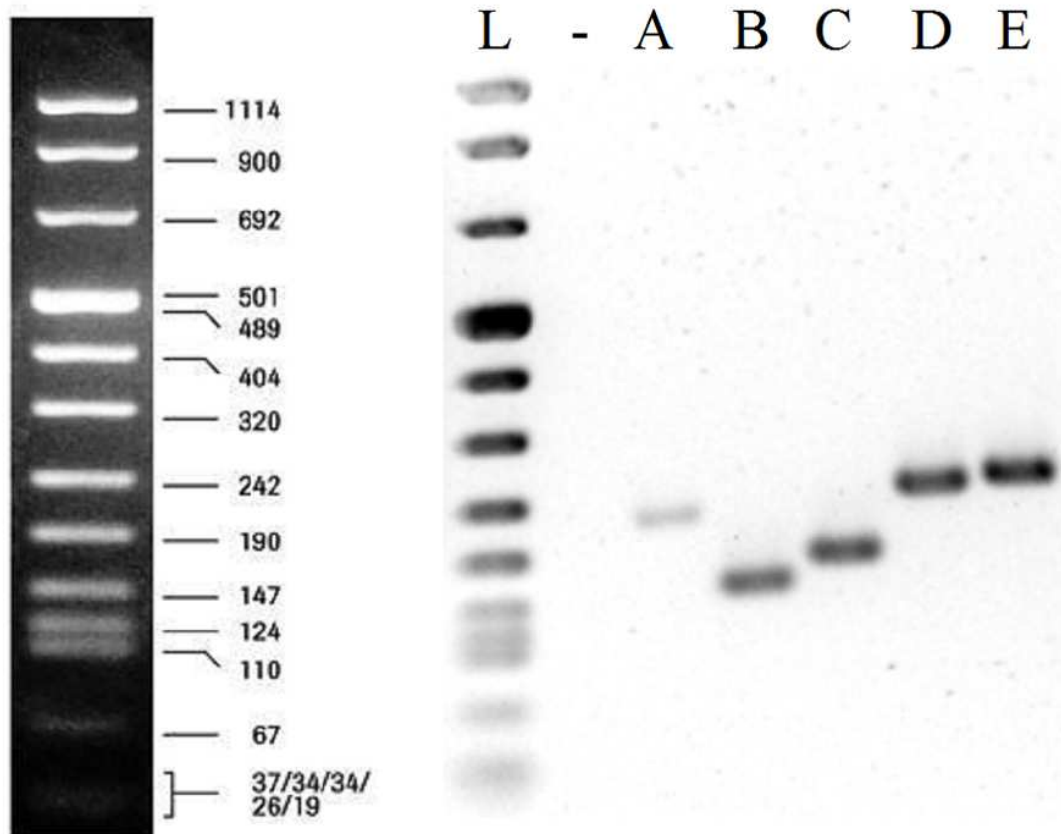

**S2 Fig. RT-PCR on PGN\_1039, *cydW*, *cydA*, *cydB* and PGN-1043.**

PCR was performed on cDNA obtained by reverse transcription of total RNA extracted from *P. gingivalis* ATCC 33277 (wild-type) with the following primers: (A) PGN\_1039-L, TTCAGCCATACGCATCTGAG / PGN\_1039-R, GTTGAATGCCACAATGTTTCG for PGN\_1039 gene ; (B) PGN\_1040-L, TCATGCGTATAGCTCGCTTTT / PGN\_1040-R, TACCGACCTGTTGCTTCAGA for *cydW* gene ; (C) PGN\_1041-L, CCGGTAGGAATGACCTTCAA / PGN\_1041-R, ATCCTTTCGCAGCAGGTAGA for *cydA* gene ; (D) PGN\_1042-L, TGGTAATGTATGGGGGAGGA / PGN\_1042-R, GAGAACCACGTTCCACAGGT for *cydB* gene ; (E) PGN\_1043-L, GTCCCGACATCATAGCAGGT / PGN\_1043-L, CAAGGTCCGTTGCCACTATT for PGN\_1043 gene. RNA extract was used as negative control (-). The ladder (L) is the DNA Molecular Weight Marker VIII (Roche).
