# Supplementary material for: The Cytochrome bd Oxidase of Porphyromonas gingivalis Contributes to Oxidative Stress Resistance and Dioxygen Tolerance
Source: PubMed Central journal article supplement (PMC4668044; doi:10.1371/journal.pone.0143808), 2015-12-02
Supplement: pone.0143808.s003.pdf [file pone.0143808.s003.pdf]

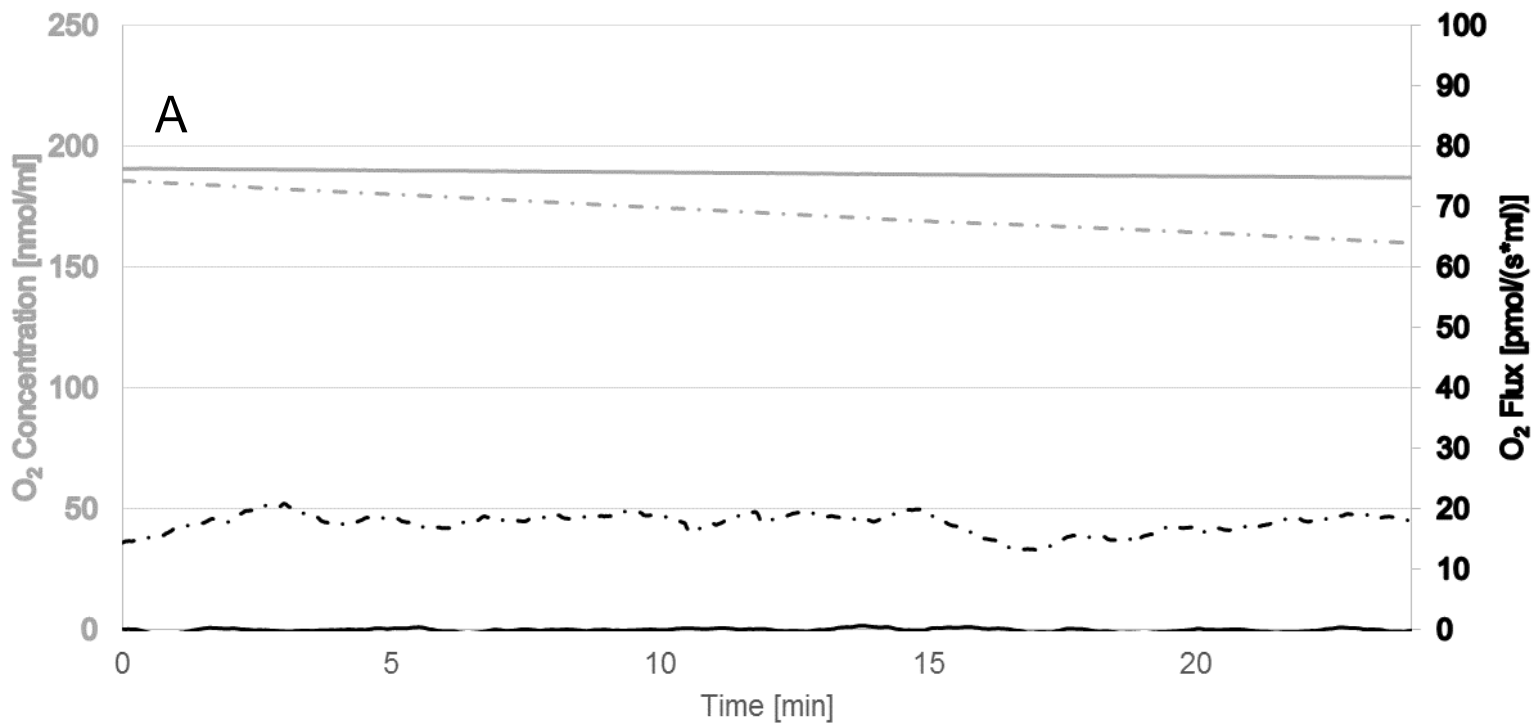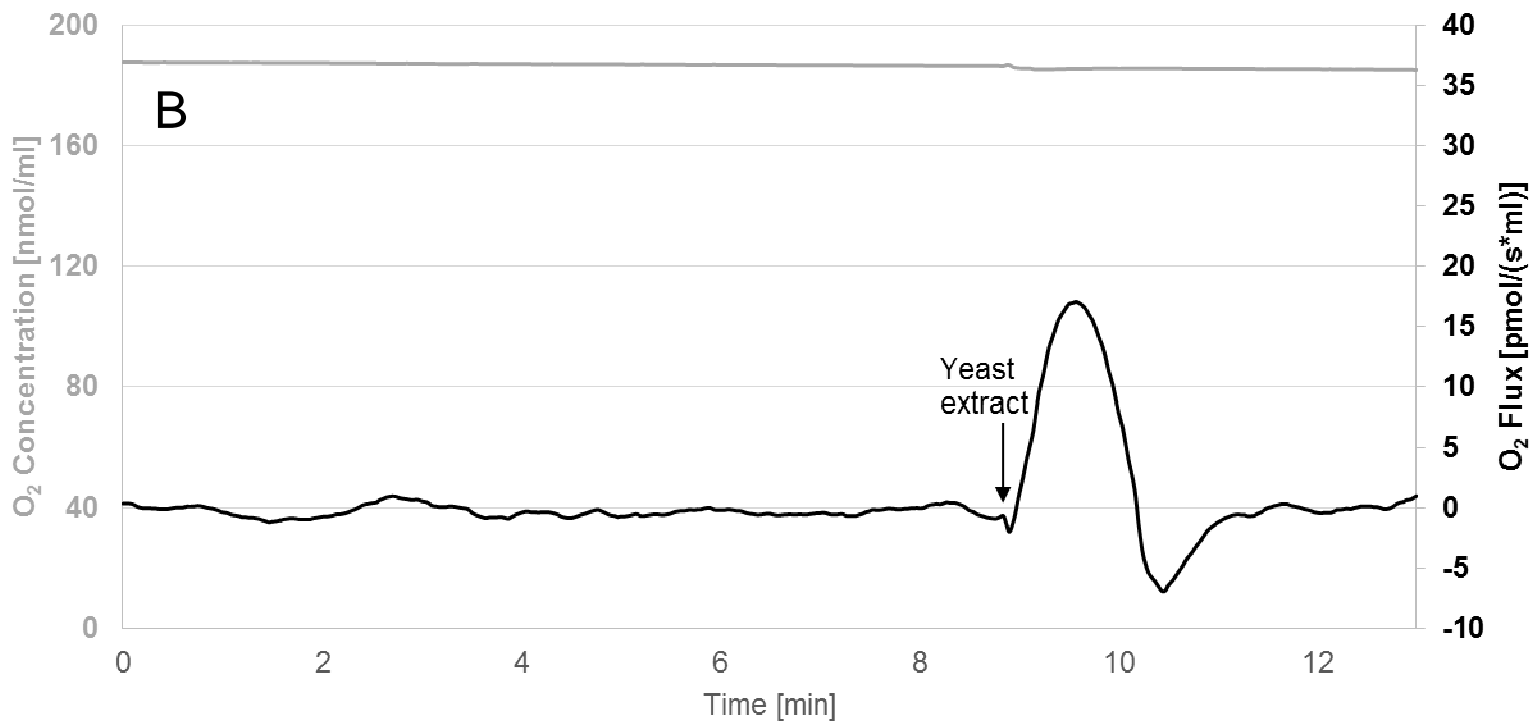

**S3 Fig. O<sub>2</sub> consumption in BHI-enriched medium and in PBS.**

**(A)** O<sub>2</sub> Flux per Volume is represented by black lines and O<sub>2</sub> concentration is represented by grey lines for both media : PBS (solid lines) and enriched BHI (dashed lines).

**(B)** The graphs represent the speed of consumption of O<sub>2</sub> (O<sub>2</sub> Flux per Volume) (black lines) by PBS and exogenous remaining O<sub>2</sub> concentrations in the oxygraph chamber (grey lines). Yeast extract (5 g/l) was added at 9 min.
