# Supplementary material for: The Cytochrome bd Oxidase of Porphyromonas gingivalis Contributes to Oxidative Stress Resistance and Dioxygen Tolerance
Source: PubMed Central journal article supplement (PMC4668044; doi:10.1371/journal.pone.0143808), 2015-12-02
Supplement: pone.0143808.s004.pdf [file pone.0143808.s004.pdf]

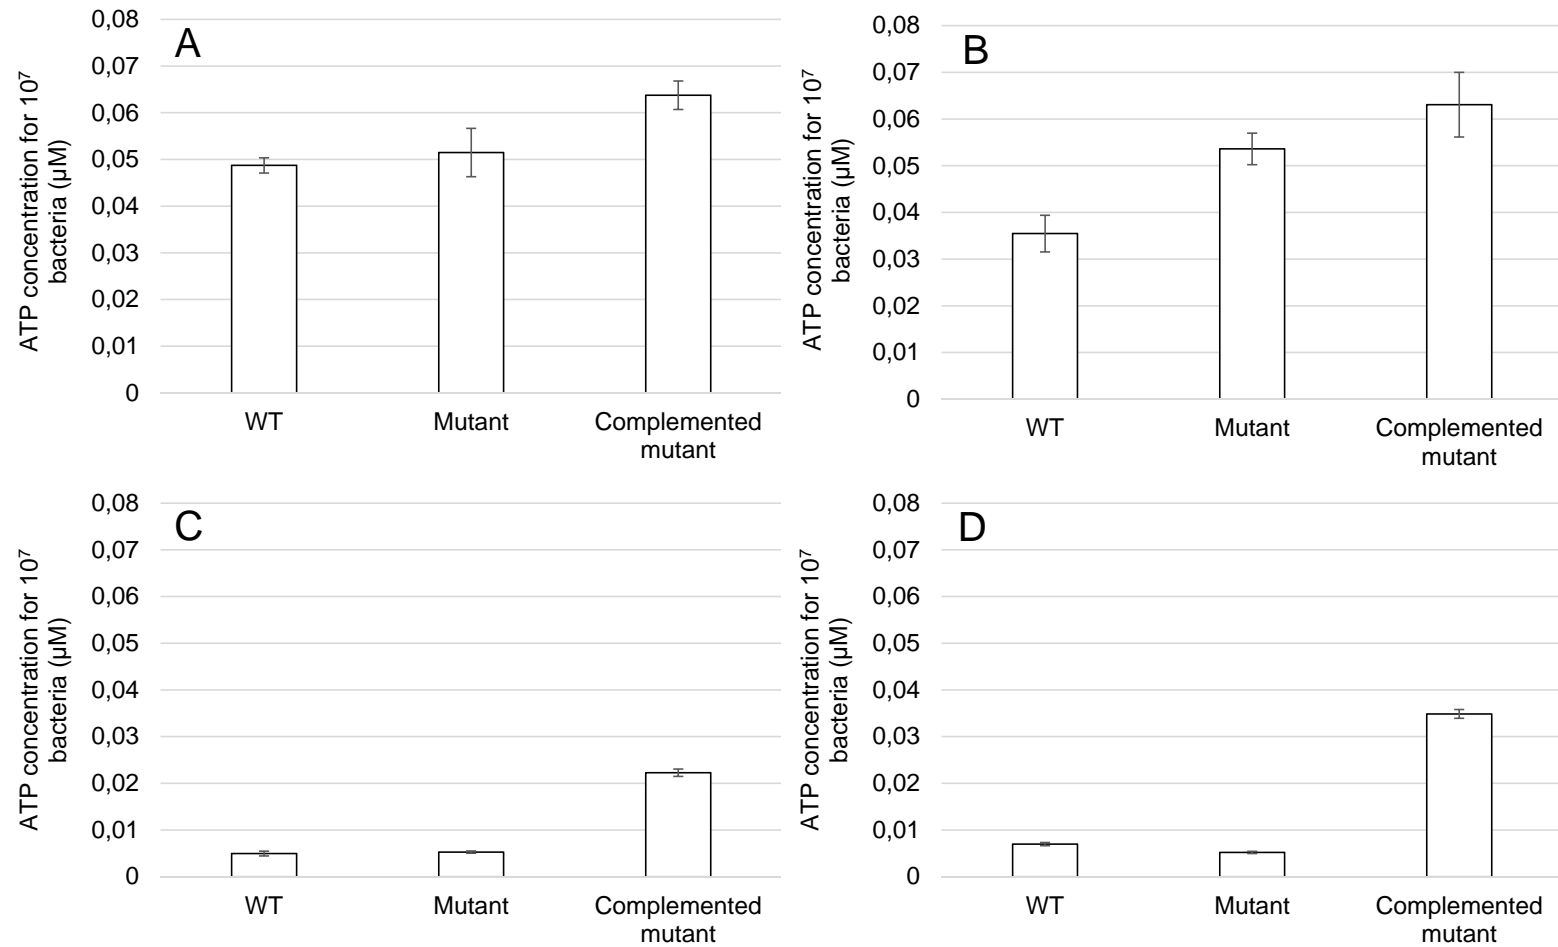

**S4 Fig. Intracellular ATP content.**

ATP content in *P. gingivalis* (wild-type, *cydAB* mutant and *cydAB* complemented mutant) was quantified by the BacTiter-Glo™ Microbial Cell Viability Assay kit (Promega). Histograms represent the concentration of ATP for  $10^7$  bacteria and bars represent standard errors. *P. gingivalis* strains were grown overnight in enriched BHI at  $\text{OD}_{600 \text{ nm}}$  of 0.5 (exponential phase). Samples were used to inoculate an enriched BHI medium to an  $\text{OD}_{600 \text{ nm}}$  of 0.1 (for **A** and **B** experiments) or were washed and suspended in PBS supplemented with 5 g/l of yeast extract to an  $\text{OD}_{600 \text{ nm}}$  of 0.1 (for **C** and **D** experiments). Each culture was split in two, one half was incubated for 7 hours in anaerobic conditions (for **A** and **C** experiments) and the other half was incubated for 5 hours in anaerobic conditions and shifted to micro-aerobic conditions for 2 hours (for **B** and **D** experiments).
